# Supplementary material for: Atrial fibrillation is an independent risk factor for mortality among patients hospitalized for alcoholic cardiomyopathy: a nationwide in-patient analysis
Source: Research Square preprint supplement (doi:10.21203/rs.3.rs-7252791/v1), 2025-08-21
Supplement: Supplementary file 1 [file f25066100cd5823eb76240a3.docx]

| **S/N** | **ENTITY** | **ICD10-CM CODES USED AND/OR NAME OF VARIABLE** |
| --- | --- | --- |
| 1 | Alcoholic Cardiomyopathy | Principal Diagnosis: I42.6 |
| 2 | Atrial Fibrillation | I48, I48.0, I48.1, I48.2, I48.91, I483., I48.4, I48.11, I48.19, I48.20, I48.21, I48.9, I48.92 |
| 3 | Invasive Mechanical Ventilation | 5A1935Z, 5A1945Z, 5A1955Z |
| 4 | Mechanical Circulatory Support | 5A02110, 5A02115, 5A02116, 5A0211D, 5A02210, 5A02215, 5A02216, 5A0221D |
| 5 | Vasopressor Requirement | 3E033XZ, 3E043XZ |
